## **“Tracking Age Differences in Neural Distinctiveness across Representational Levels”**

**Malte Kobelt,<sup>1,2\*</sup> Verena R. Sommer,<sup>1\*</sup> Attila Keresztes,<sup>3,4</sup> Markus Werkle-Bergner,<sup>1†</sup> and Myriam C. Sander<sup>1†</sup>**

<sup>1</sup> Center for Lifespan Psychology, Max Planck Institute for Human Development, Berlin, 14195, Germany, <sup>2</sup> Institute of Cognitive Neuroscience, Ruhr-Universität Bochum, Bochum, 44780, Germany, <sup>3</sup> Brain Imaging Centre, Research Centre for Natural Sciences, Budapest, 1117, Hungary, and <sup>4</sup> Faculty of Education and Psychology, Eötvös Loránd University, Budapest, 1053, Hungary

The authors have withdrawn the preprint due to two errors in the analyses: The first error was a failure to account for three dummy volumes (TR = 2s) collected at the beginning of each experimental run. The second error was a coding error related to the definition of the category-selective clusters. Since correcting for these errors drastically altered the results and conclusions of this paper, the authors have withdrawn the preprint and retracted the published paper. More information as well as a report comparing original and corrected results can be found on <https://osf.io/t8dpv/>. If you have any questions please contact the corresponding author ([sander@mpib-berlin.mpg.de](mailto:sander@mpib-berlin.mpg.de)).
